# Supplementary material for: A lysosome targetable versatile fluorescent probe for imaging viscosity and peroxynitrite with different fluorescence signals in living cells
Source: Royal Society of Chemistry journal article supplement (doi:10.1039/c7tb02615c), 2017-12-19
Supplement: c7tb02615c1.pdf [file c7tb02615c1.pdf]

**A lysosome-targetable versatile fluorescent probe for imaging  
viscosity and peroxynitrite with different fluorescence signals in  
living cells**

Bingpeng Guo, Jing Jing, Longxue Nie, Fangyun Xin, Congcong Gao, Wen Yang\*  
and Xiaoling Zhang\*

Key Laboratory of Cluster Science of Ministry of Education, Beijing Key Laboratory  
of Photoelectronic/Electrophotonic Conversion Materials, Analytical and Testing  
Center, School of Chemistry and chemical engineering, Beijing Institute of  
Technology, Beijing 100081, P. R. China

\*E-mail: [zhangxl@bit.edu.cn](mailto:zhangxl@bit.edu.cn); [wenyang@bit.edu.cn](mailto:wenyang@bit.edu.cn);

Fax: +86-10-88875298; Tel: +86-10-88875298.

## **Contents**

- 0. The synthetic route of Lyso-NA**
- 1. UV-vis absorption spectra of Lyso-NA**
- 2. The effect of pH**
- 3. The kinetic profile of the recognition of Lyso-NA for ONOO<sup>-</sup>**
- 4. The effect of DMSO to HClO**
- 5. The two channels of Lyso-NA in the cells**
- 6. Spectral data**

## The synthetic route of Lyso-NA

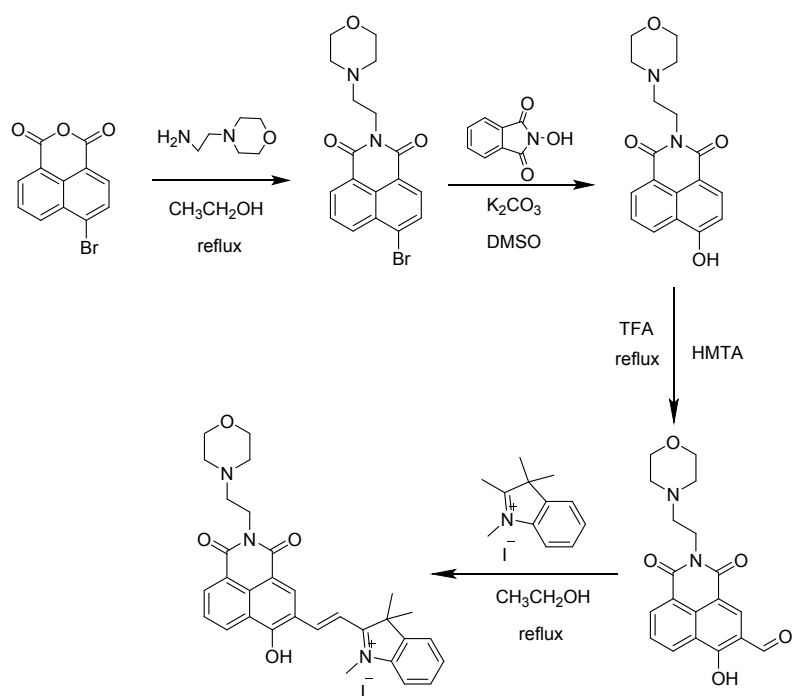

### 1. UV-vis absorption spectra of Lyso-NA

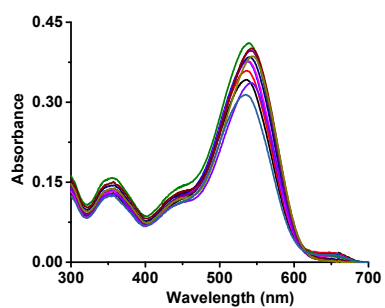

**Fig S1.** UV-vis absorption spectra of Lyso-NA (5  $\mu\text{M}$ ) in different ratio of glycerol-water.

## 2. The effect of pH

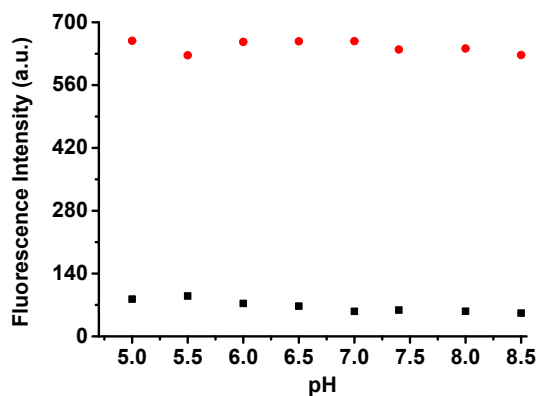

Fig S2. The effect of pH on Lyso-NA in different viscosity

## 3. The kinetic profile of the recognition of Lyso-NA for ONOO<sup>-</sup>

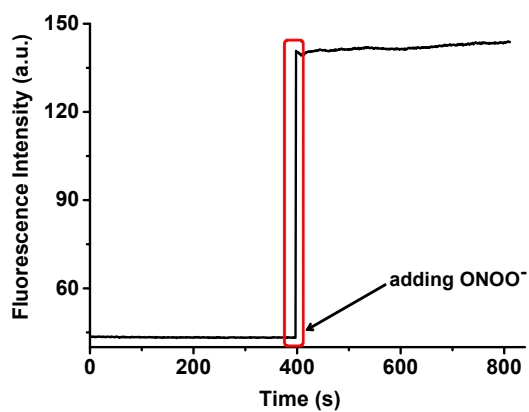

Fig S3. The fluorescence spectra of Lyso-NA (5  $\mu$ M) after the addition of ONOO<sup>-</sup> (150  $\mu$ M) in H<sub>2</sub>O: Ethanol=5:5 (v/v), pH=5.0, 10 mM CPBS at room temperature. Excitation wavelength = 440 nm, excitation and emission slit widths = 5 nm and 5 nm.

#### 4. The affect of DMSO to HCIO

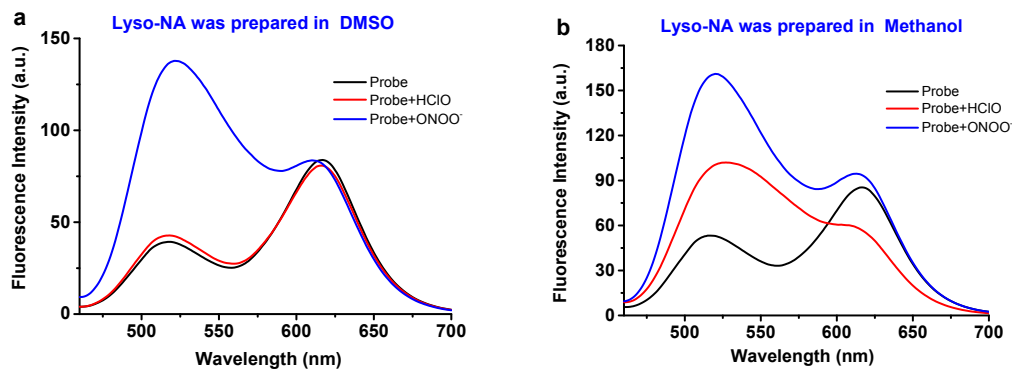

**Fig S4.** (a) The fluorescence spectra of **Lyso-NA** ( $5 \mu\text{M}$ ) in the presence of **HCIO** ( $150 \mu\text{M}$ ) or **ONOO** ( $150 \mu\text{M}$ ) in  $\text{H}_2\text{O}$ : Ethanol=5:5 (v/v) contained 0.5% DMSO, pH=5.0, 10 mM CPBS at room temperature. (b) The fluorescence spectra of **Lyso-NA** ( $5 \mu\text{M}$ ) in the presence of **HCIO** ( $150 \mu\text{M}$ ) or **ONOO** ( $150 \mu\text{M}$ ) in  $\text{H}_2\text{O}$ : Ethanol=5:5 (v/v) contained 0.5% Methanol, pH=5.0, 10 mM CPBS at room temperature.

#### 5. The two channels of Lyso-NA in the cells

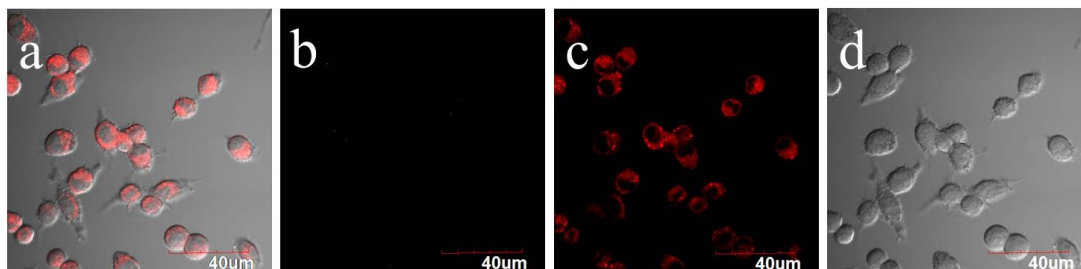

**Fig. S5** Confocal fluorescence images of RAW.264.7 cells stained by **Lyso-NA** ( $5 \mu\text{M}$ ). (a) overlay of green and red channels. (b) green channel of **Lyso-NA** (460-540 nm), excited at 404 nm. (c) red channel of **Lyso-NA** (580-670 nm), excited at 543 nm. (d) bright field image.

## 6. Spectral data

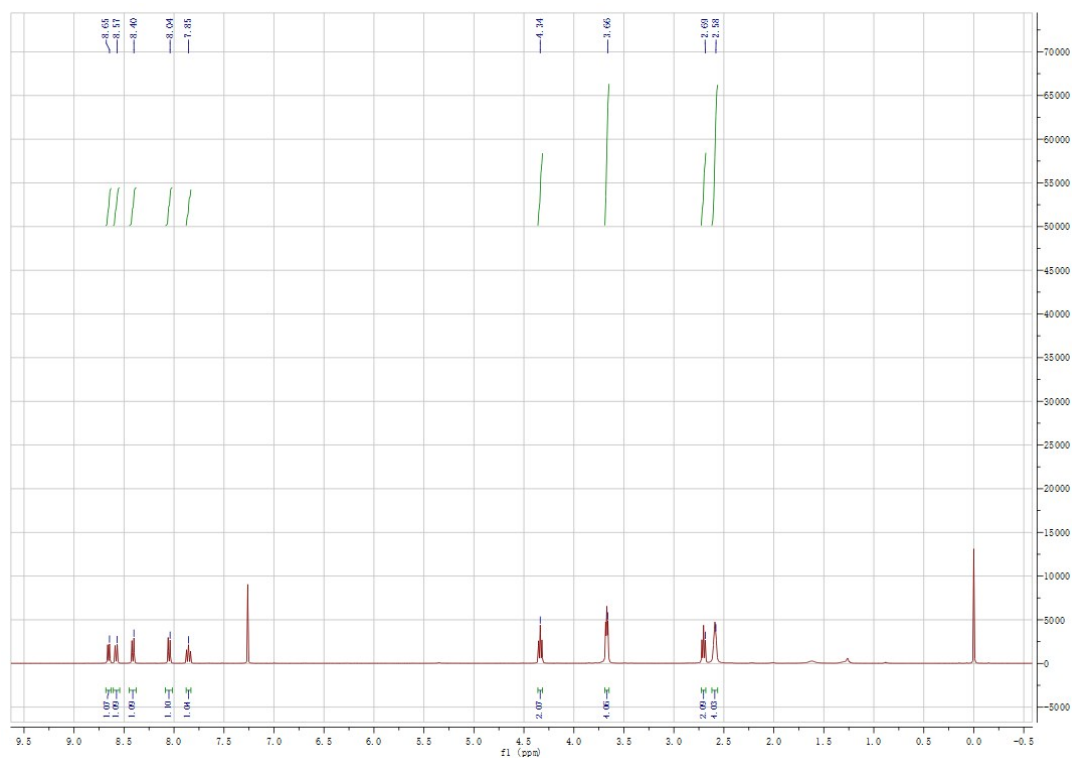

**Fig S6.**  $^1\text{H-NMR}$  of N-(Morpholinoethylamino)-4-Bromo-1,8-Naphthalimide in  $\text{CDCl}_3$

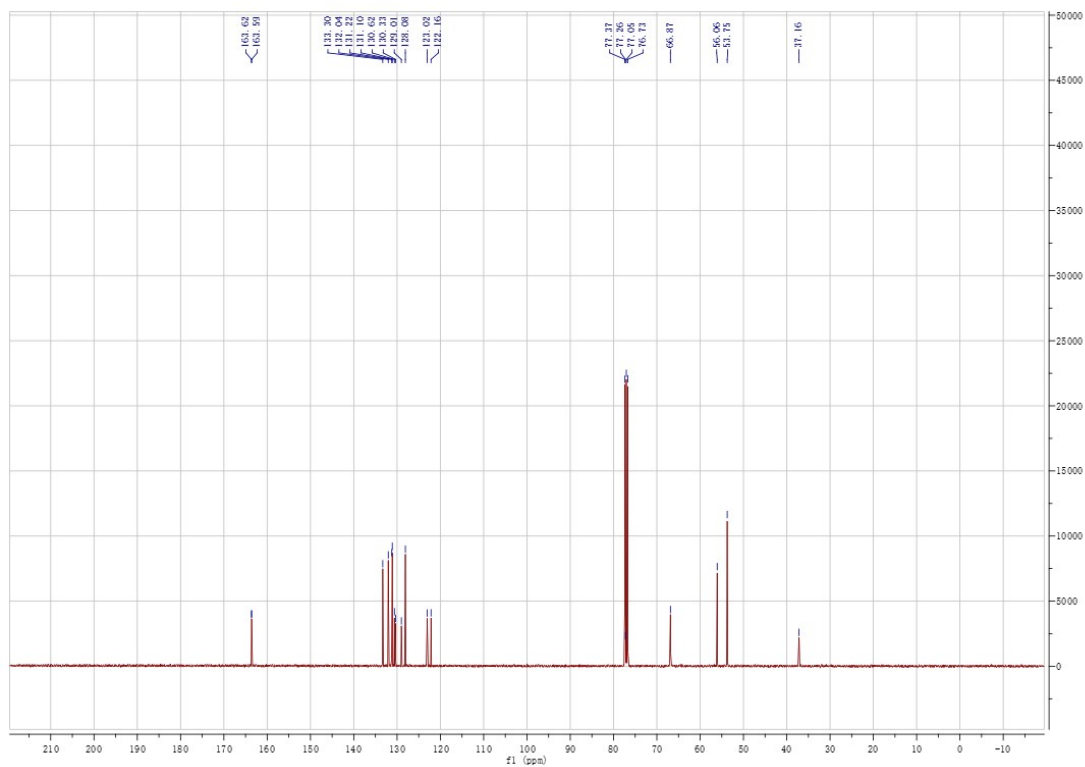

**Fig S7.**  $^{13}\text{C-NMR}$  of N-(Morpholinoethylamino)-4-Bromo-1,8-Naphthalimide in  $\text{CDCl}_3$

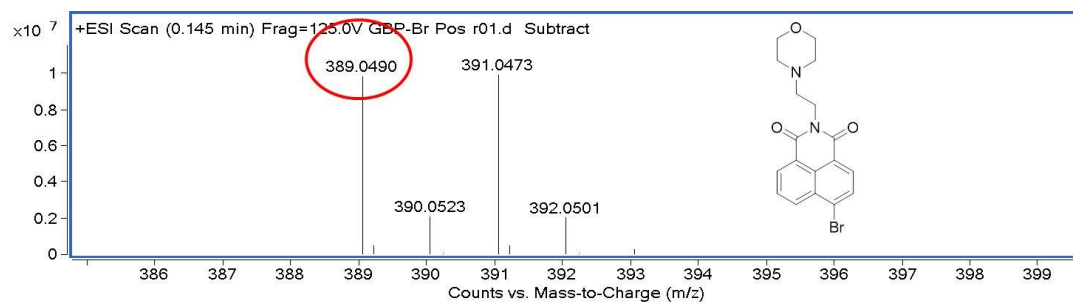

**Fig S8.** The mass spectrum of N-(Morpholinoethylamino)-4-Bromo-1,8-Naphthalimide

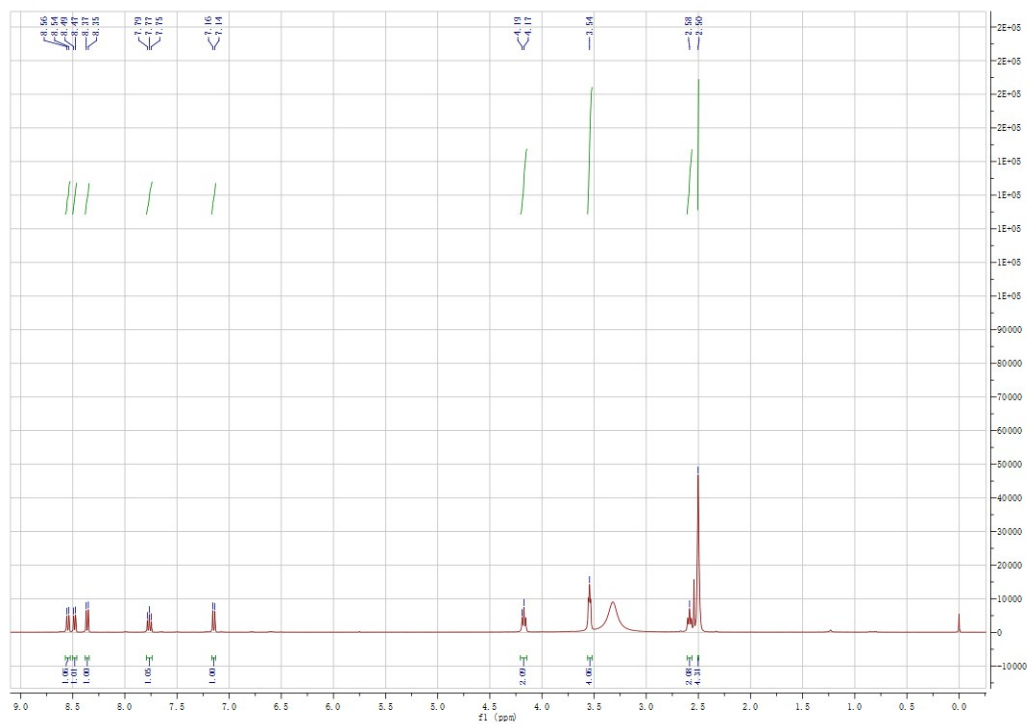

**Fig S9.**  $^1\text{H-NMR}$  of N-(Morpholinoethylamino)-4-hydroxy-1,8-naphthalimide in DMSO

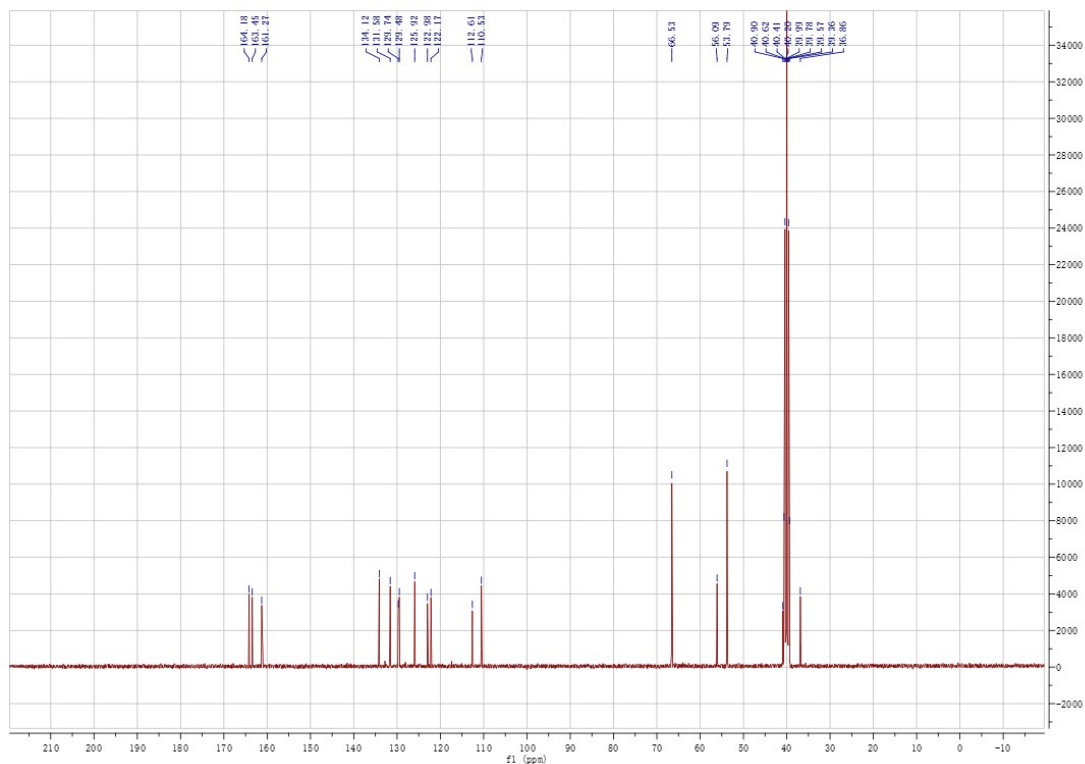

**Fig S10.**  $^{13}\text{C}$ -NMR of N-(Morpholinoethylamino)-4-hydroxy-1,8-naphthalimide in DMSO

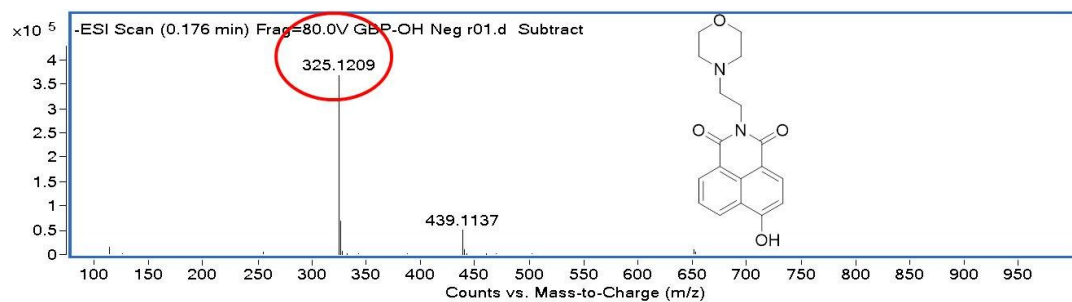

**Fig S11.** H-NMR of N-(Morpholinoethylamino)-4-hydroxy-1,8-naphthalimide



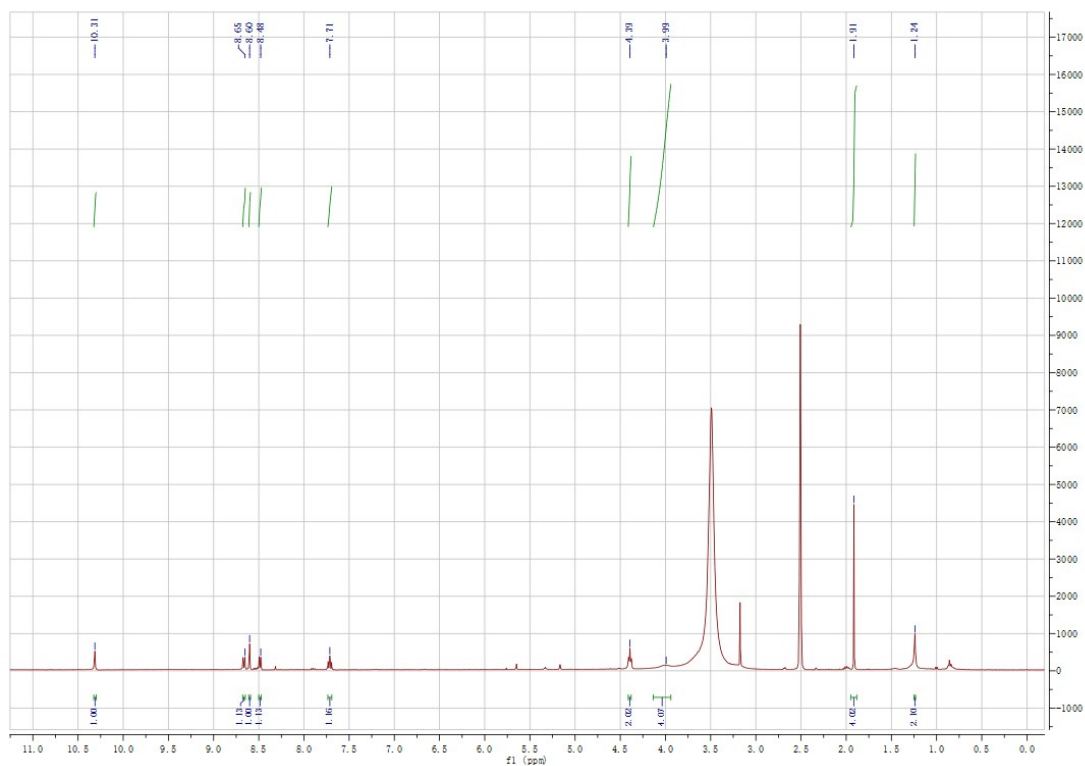

**Fig S12.**  $^1\text{H}$ -NMR of N-(Morpholinoethylamino)-3-formyl -4-hydroxy-1,8-naphthalimide in DMSO

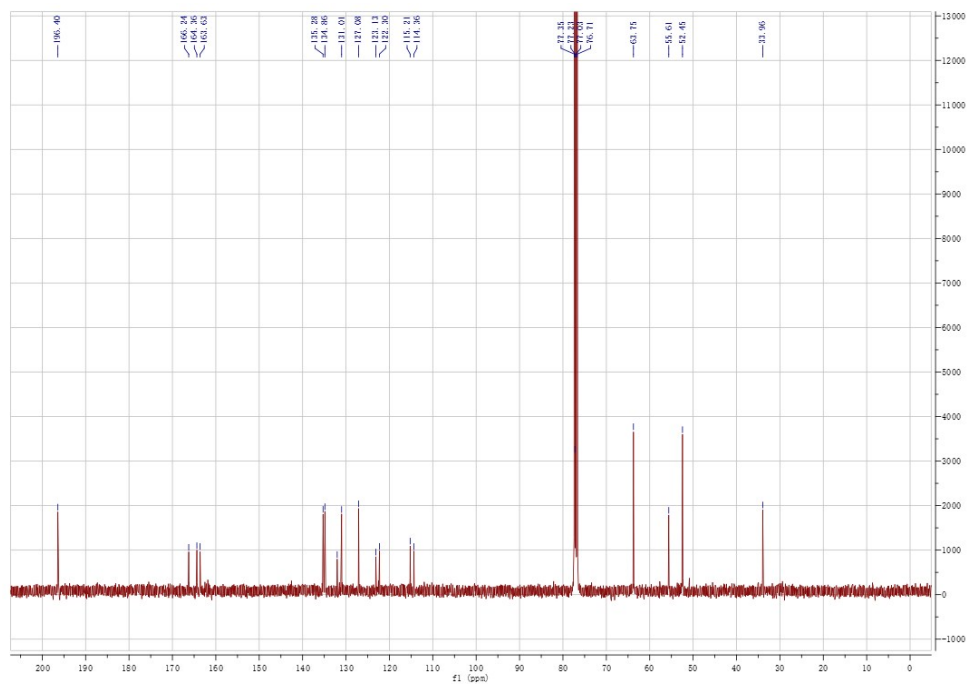

**Fig S13.**  $^{13}\text{C}$ -NMR of N-(Morpholinoethylamino)-3-formyl -4-hydroxy-1,8-naphthalimide in  $\text{CDCl}_3$

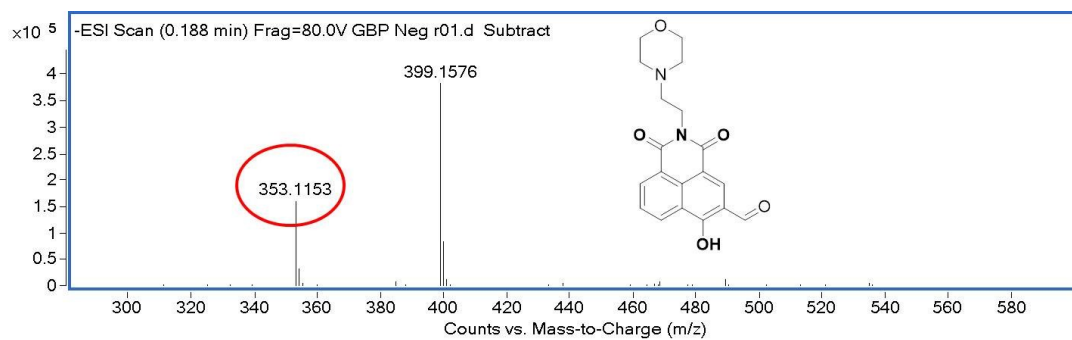

**Fig S14.** H-NMR of N-(Morpholinoethylamino)-3-formyl-4-hydroxy-1,8-naphthalimide

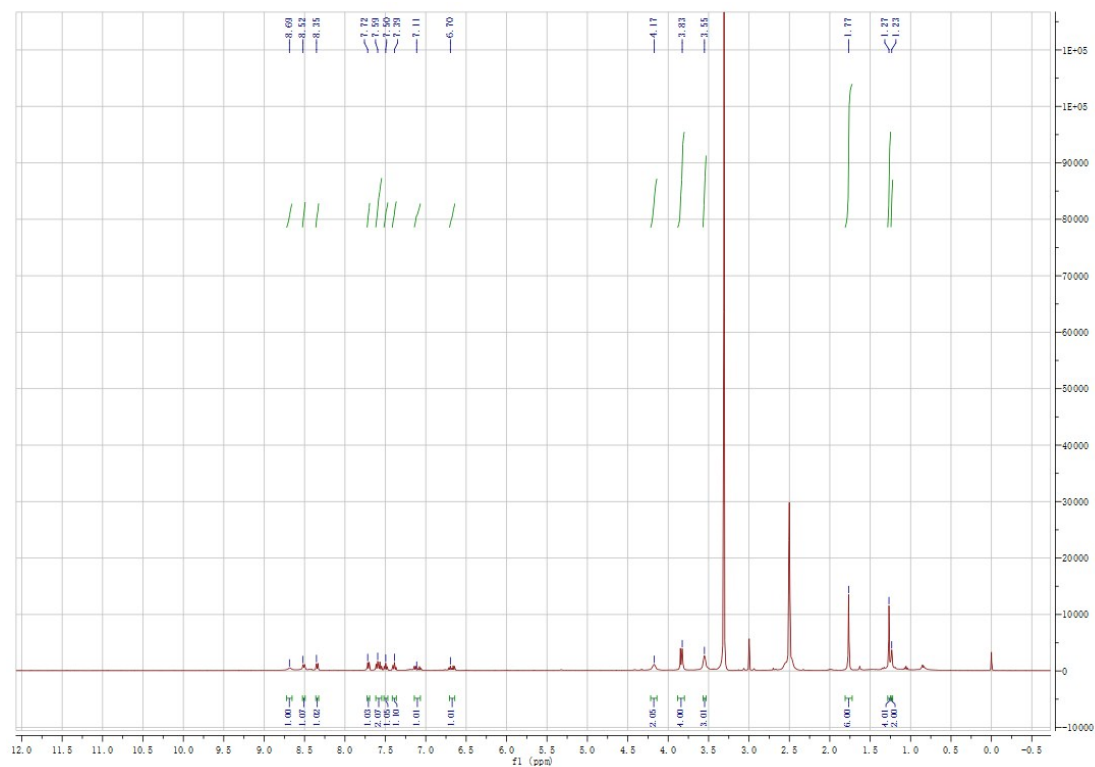

**Fig S15.** H-NMR of Lyso-NA in DMSO

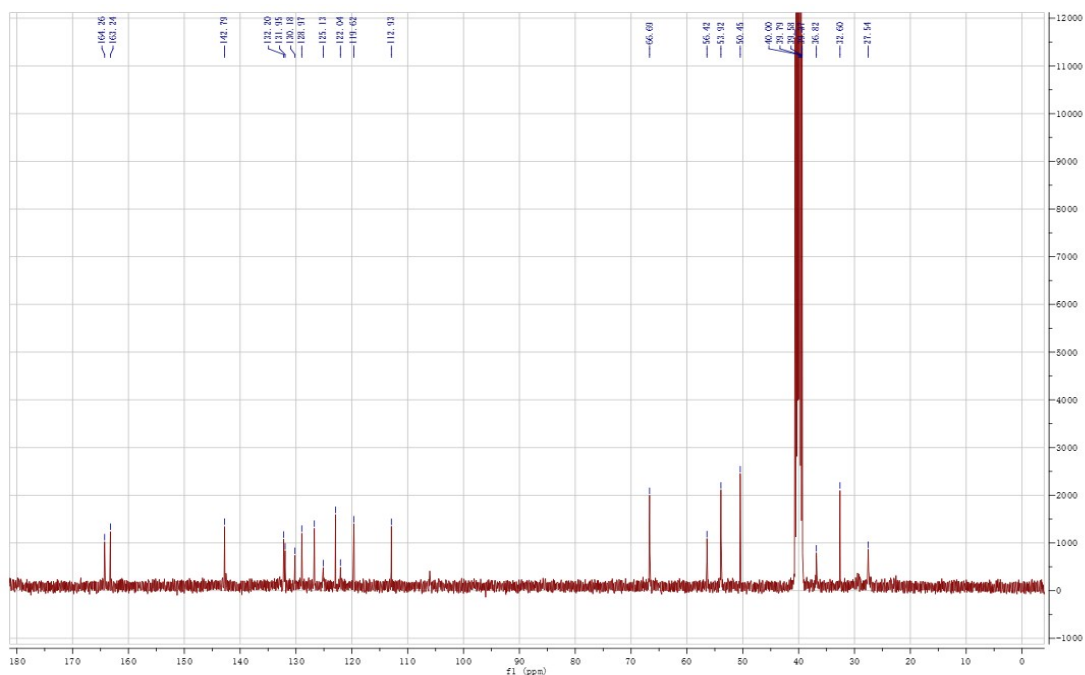

**Fig S16.**  $^{13}\text{C}$ -NMR of Lyso-NA in DMSO

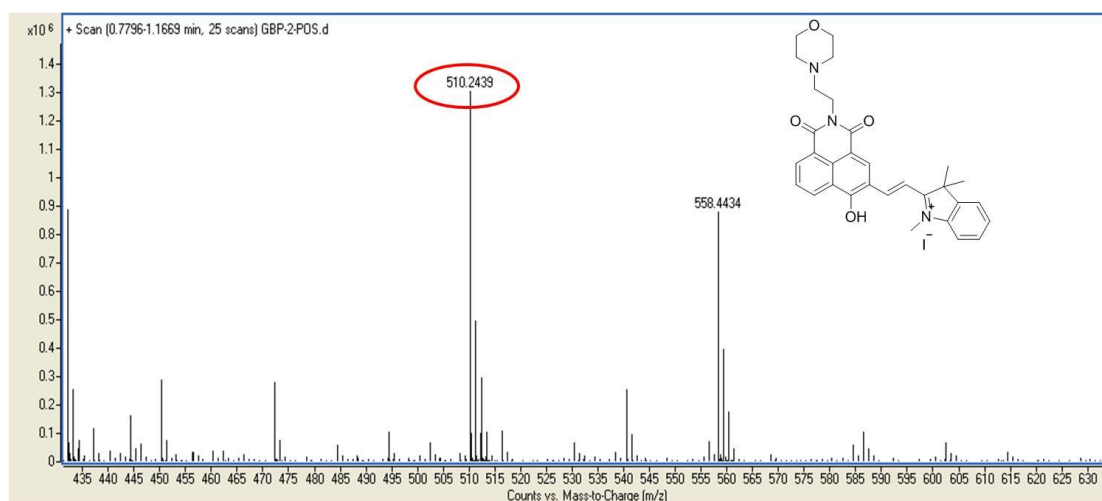

**Fig S17.** The mass spectrum of Lyso-NA

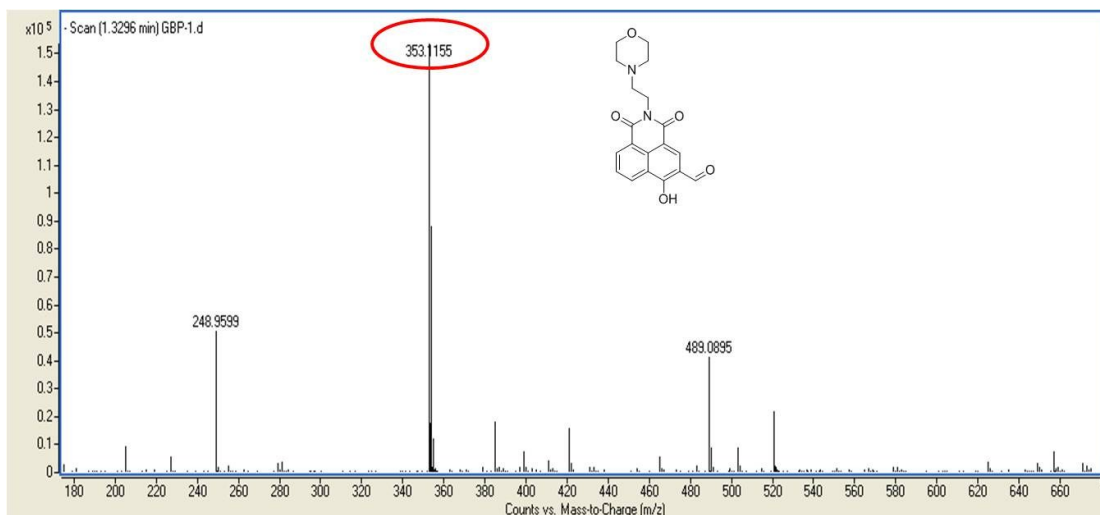

**Fig S18.** The mass spectrum of the reaction mixture of **Lyso-NA** with ONOO<sup>-</sup>
